# Supplementary material
Source: ML conference proceedings conference paper supplement (https://aclanthology.org/D19-1522)

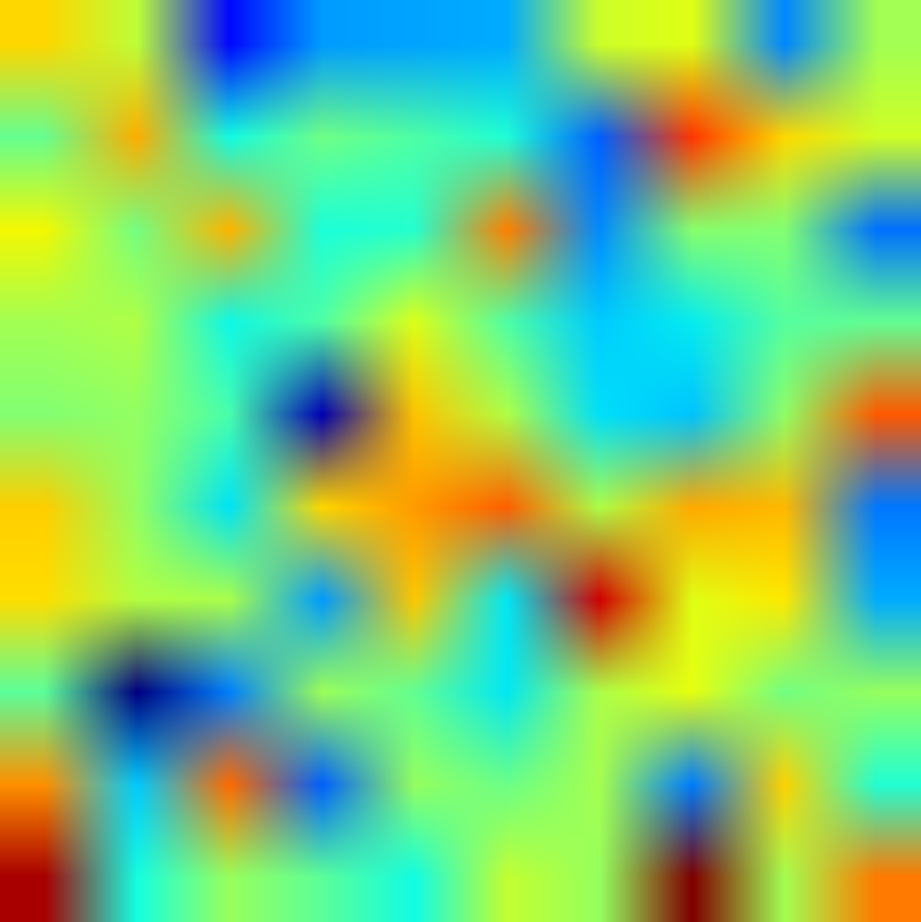

Supplement: Attachment [file W_hypernym.pdf › W_hypernym.pdf]

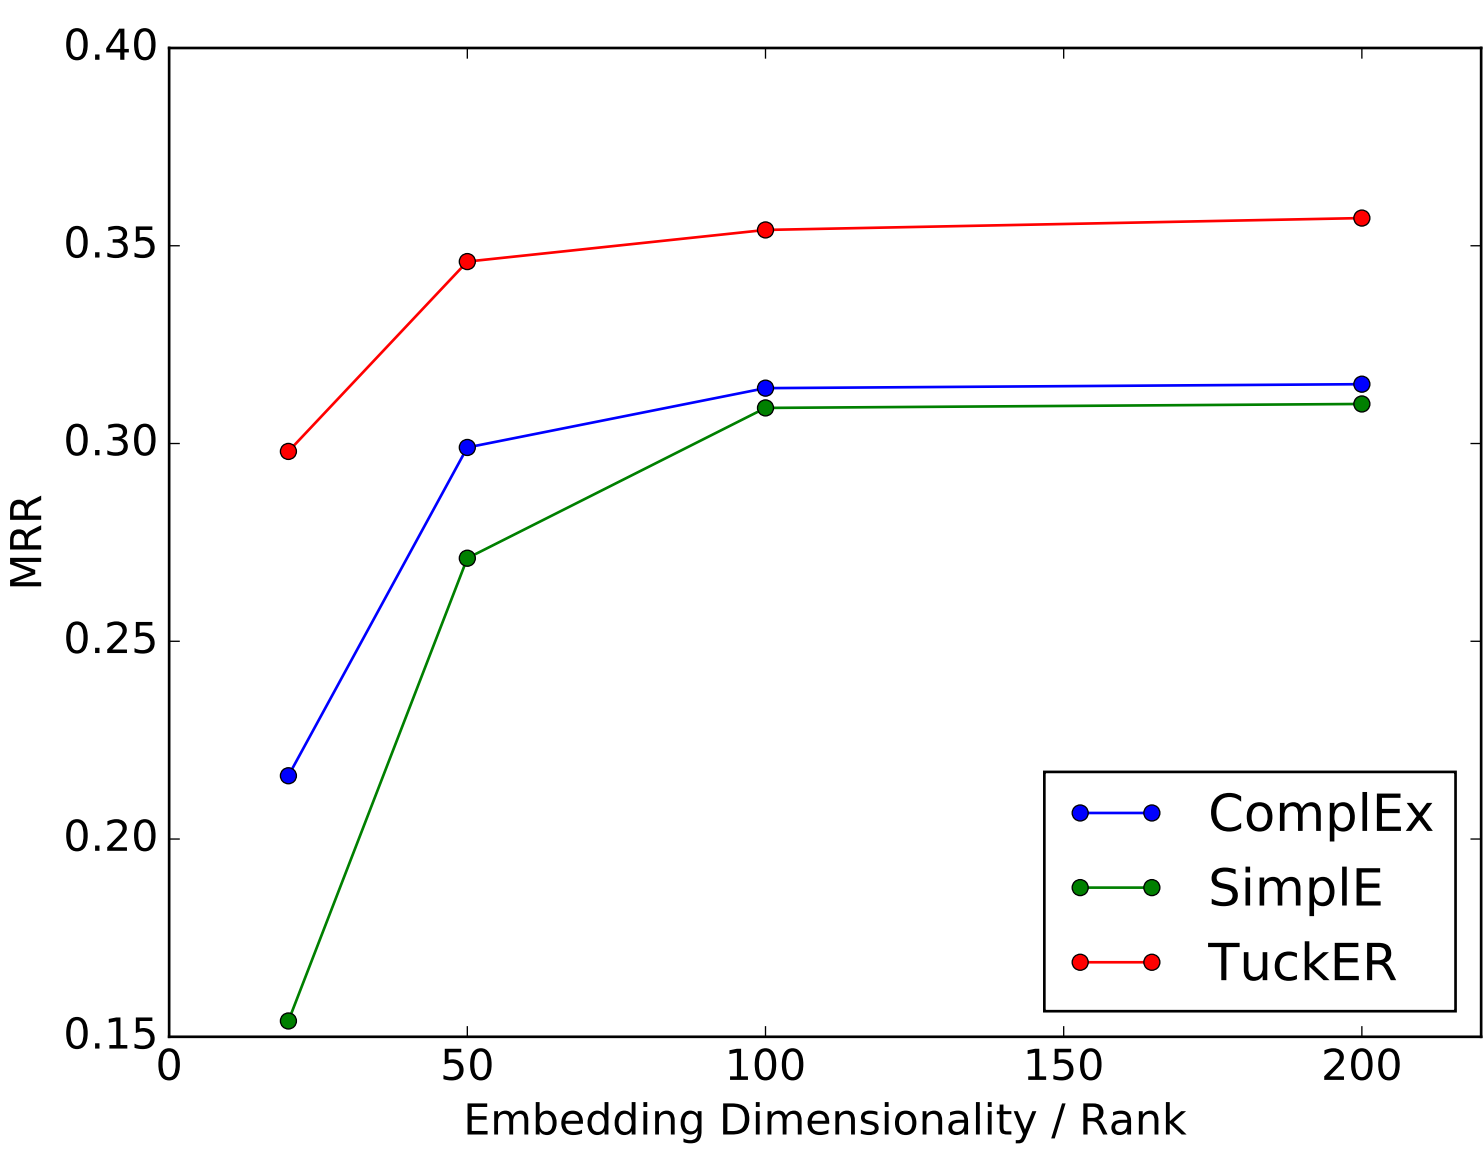

Supplement: Attachment [file embedding_dim.pdf › embedding_dim.pdf]
